# Supplementary material for: A Multi-Model Based Stability Analysis Employing Multi-Environmental Trials (METs) Data for Discerning Heat Tolerance in Chickpea (Cicer arietinum L.) Landraces
Source: MDPI journal article supplement (doi:10.3390/plants12213691), 2023-10-26
Supplement: s1 [file s1]

# Supplementary figures

Supplementary Fig S1. Plots showing the pictorial representation of Genotype and overall mean performance of studied trait at each environment under study.

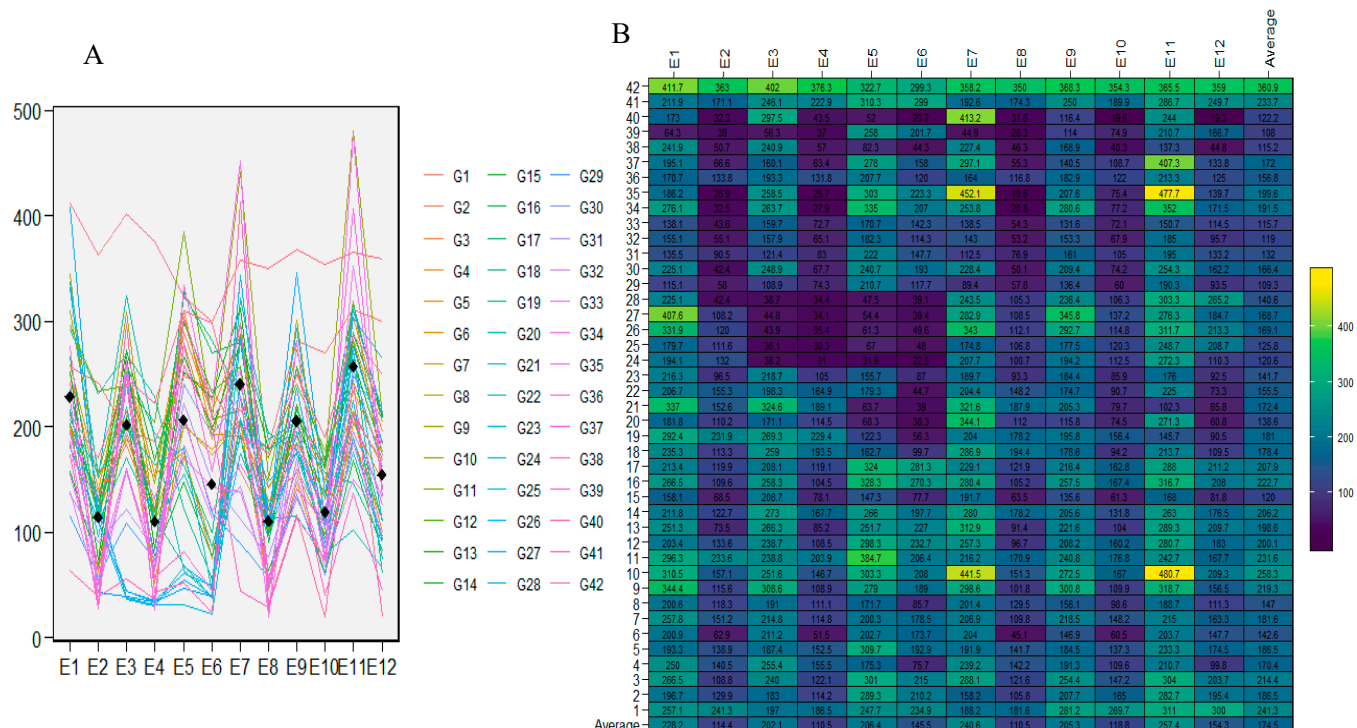

Supplementary Fig S2. (A) AMMI 2 biplots of PC1, PC2 and PC3

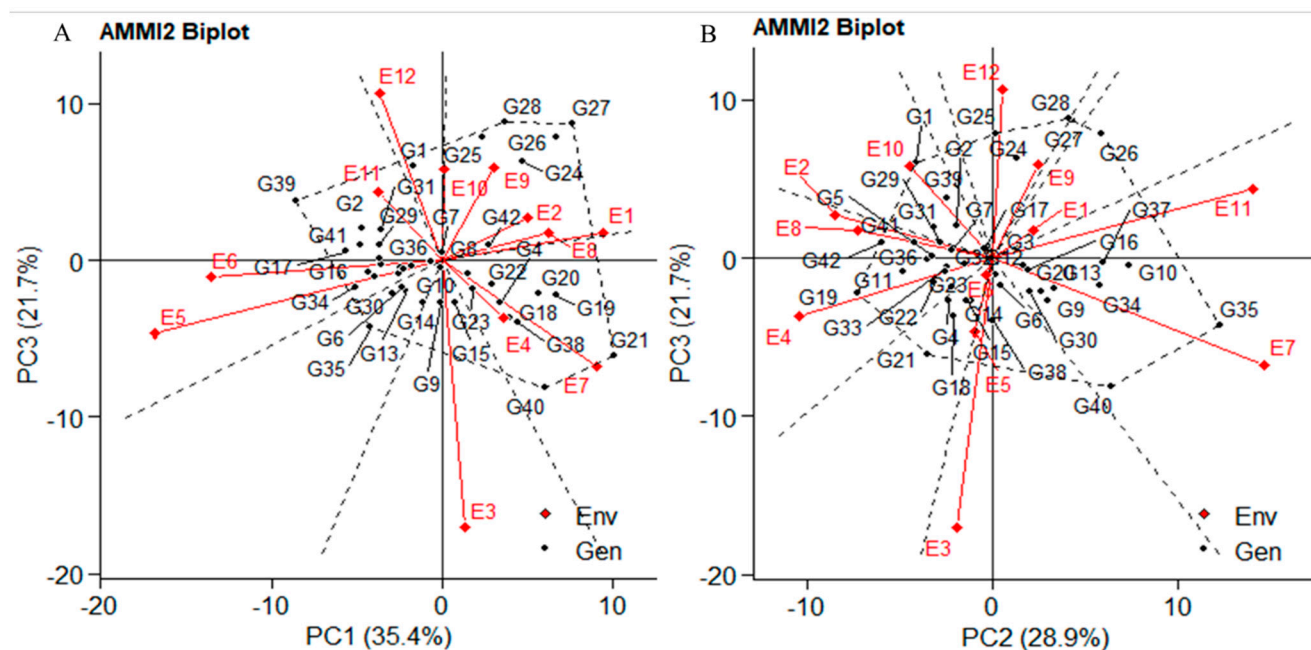

Supplementary Fig S3. (A) displays the calculated values of weighted average of stability (WAASB) and mean performance (Y) (WAASBY) for 42 genotypes, (B) Rankings of 42 genotypes under varying weights for stability and yield. The leftmost ranks reflect stability-based rankings, while the rightmost ranks correspond to grain yield-based rankings. In between

these extremes, the ranks are determined with diverse stability and yield weight combinations. The four clusters represent distinct genotype classes: (1) Genotypes with low productivity and instability; (2) Genotypes with productivity yet instability; (3) Genotypes that are highly productive and stable; and (4) Genotypes that are stable but less productive

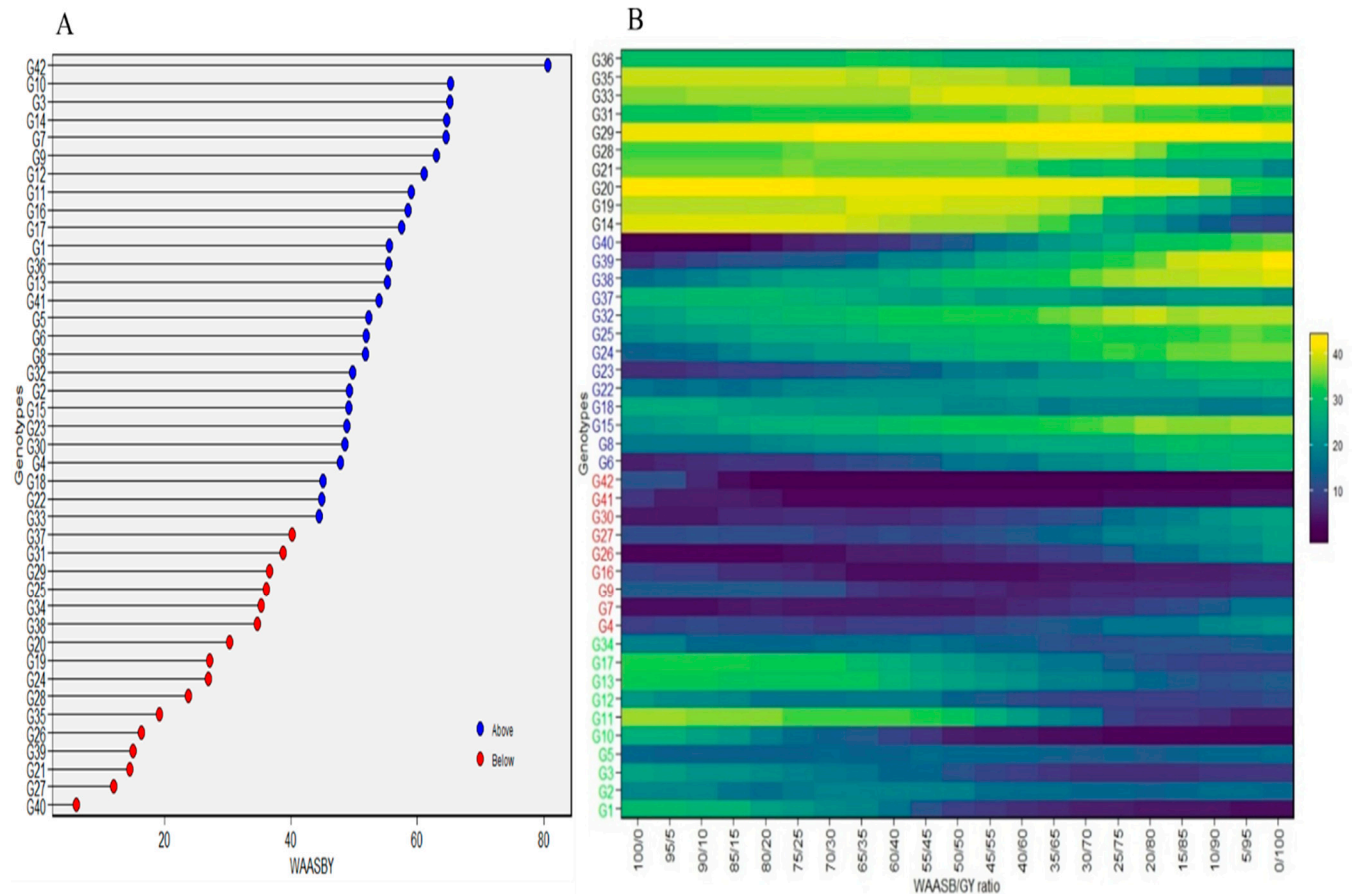

Supplementary Fig S4. (A) Heatmap of Genotypes x environmental interactions, (B) Correlation between stability indices.

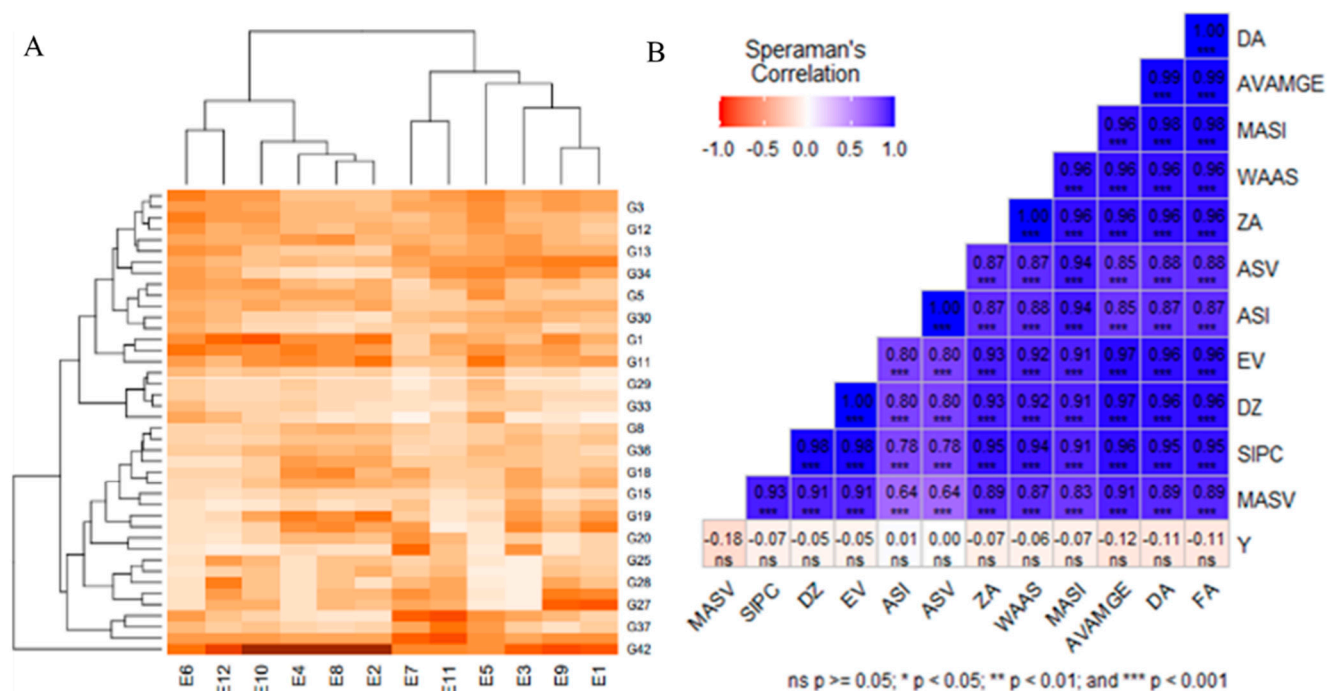

ASI, AMMI Stability Index; ASV, AMMI stability value; AVAMGE, sum across environments of the absolute value of GEI modelled by AMMI; DA, Annicchiarico's D parameter; DZ, Zhang's D parameter; EV, averages of the squared eigenvector values; FA, stability measure based on fitted AMMI model; MASI, Modified AMMI Stability Index; MASV, modified AMMI stability value; SIPC, sums of the absolute value of the IPC scores; ZA, absolute value of the relative contribution of IPCs to the interaction; WAAS, weighted average of absolute scores.

Supplementary Fig S5. (A) Comparative analysis of JG14 (G42) and ILC1932 (G39) across diverse environments (SVP = 3), (B) GGE biplot 'Env. Geno. Relationship' view for 42 genotypes, two seasons, three locations, yield per plot. Biplots: Centering = 2, SVP = 2, Scaling = 0.

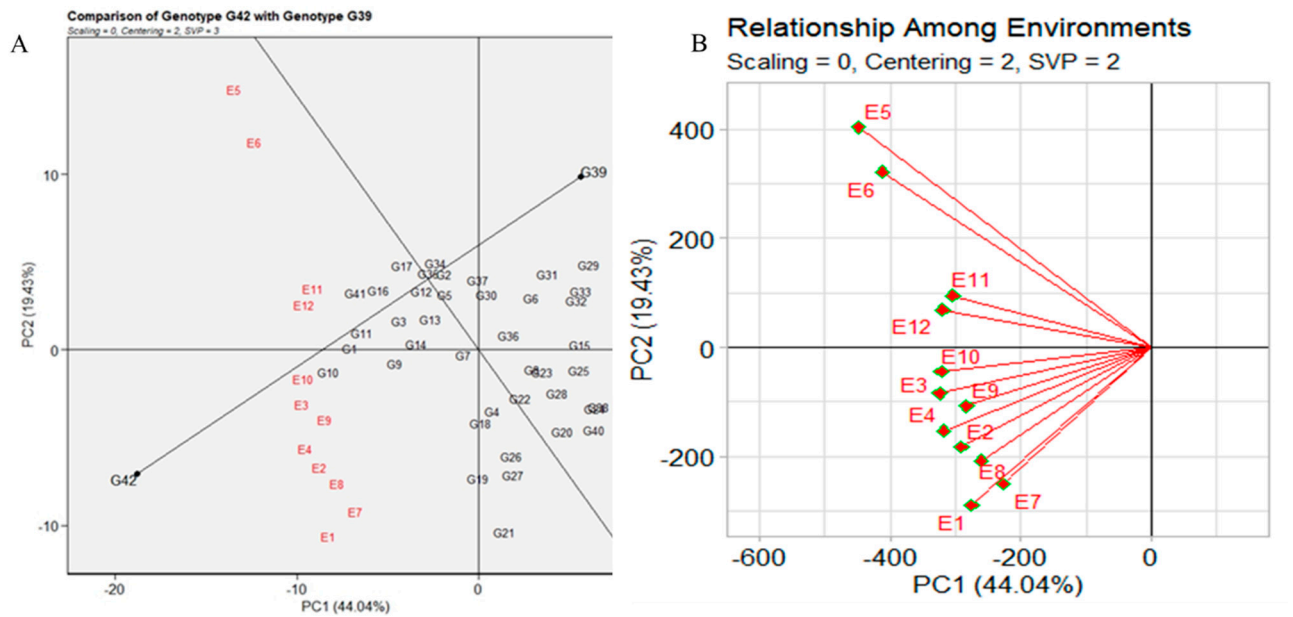

Supplementary Fig S6. (A) Genotype ranking according to performance in a specific environment (E10). (B) Ranking trial environments based on the relative performance of genotypes G1 and G2.

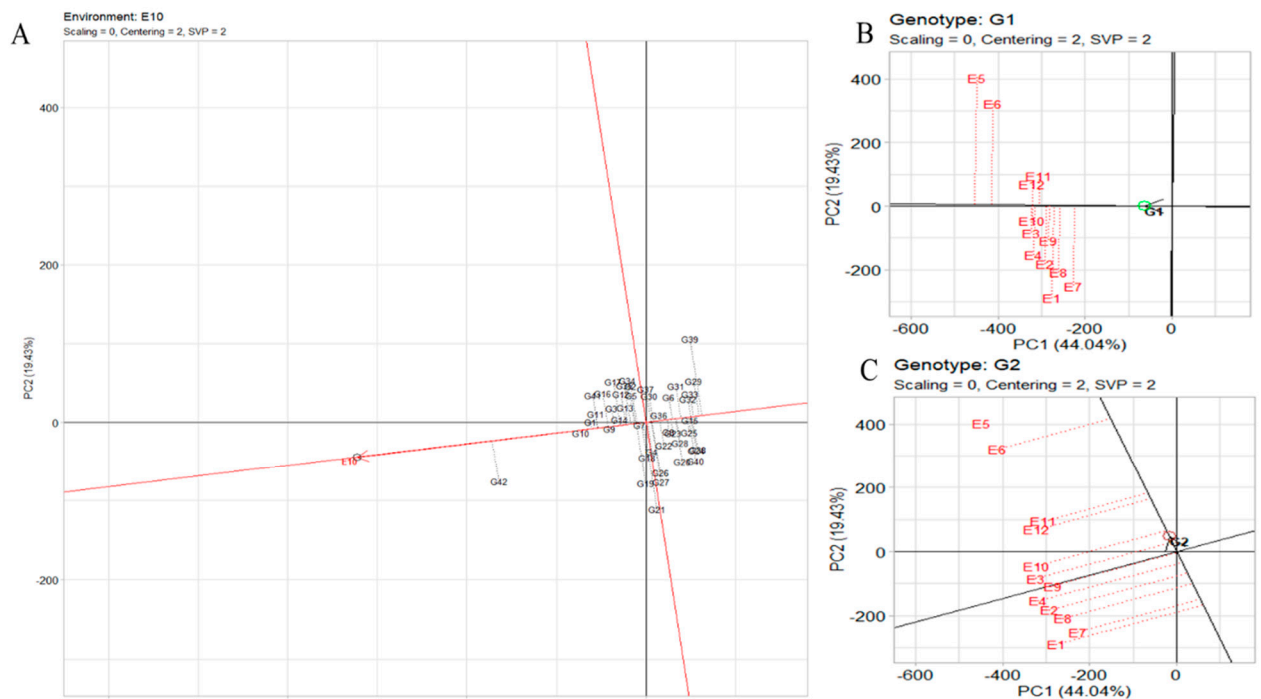



Supplementary Fig S7. Field pictures of the heat tolerant testing

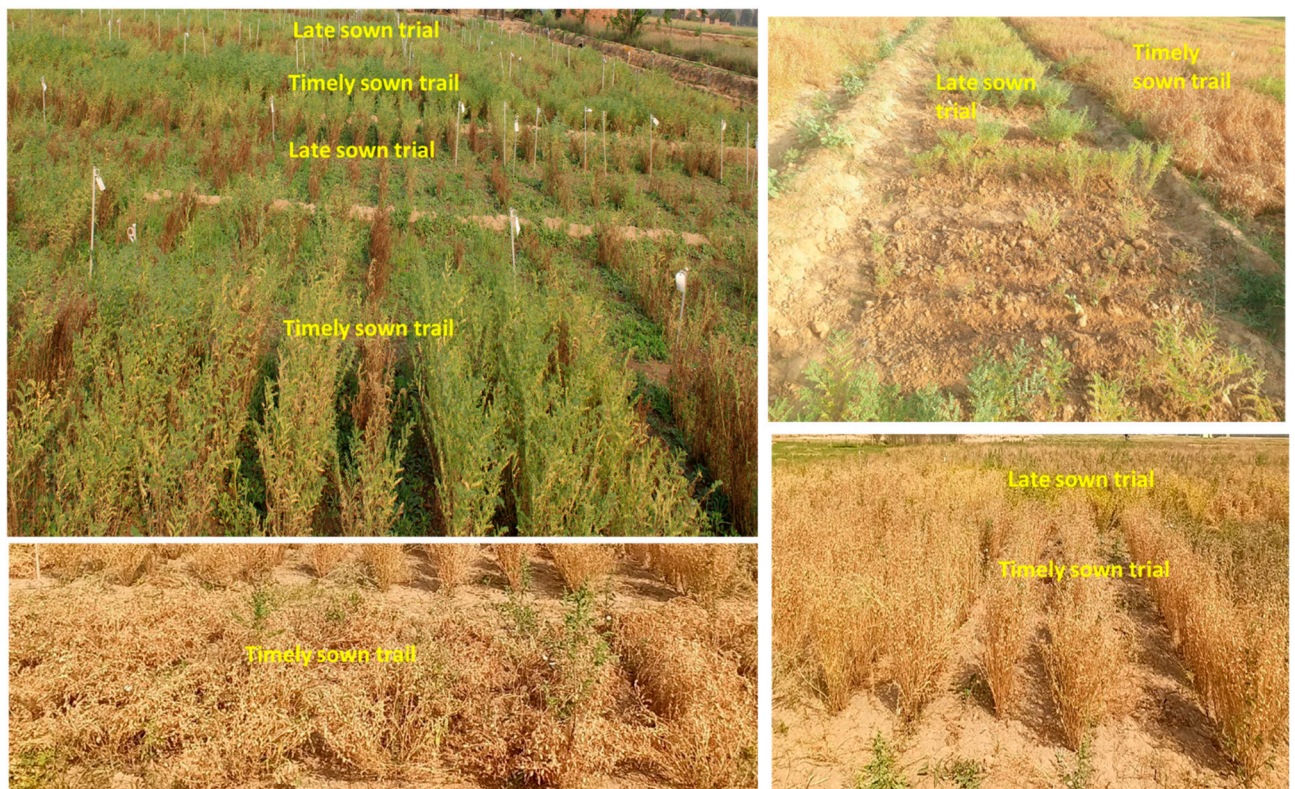

Supplementary Fig S8. Graph of monthly average temperature of chickpea growing season of 2021 to 2023

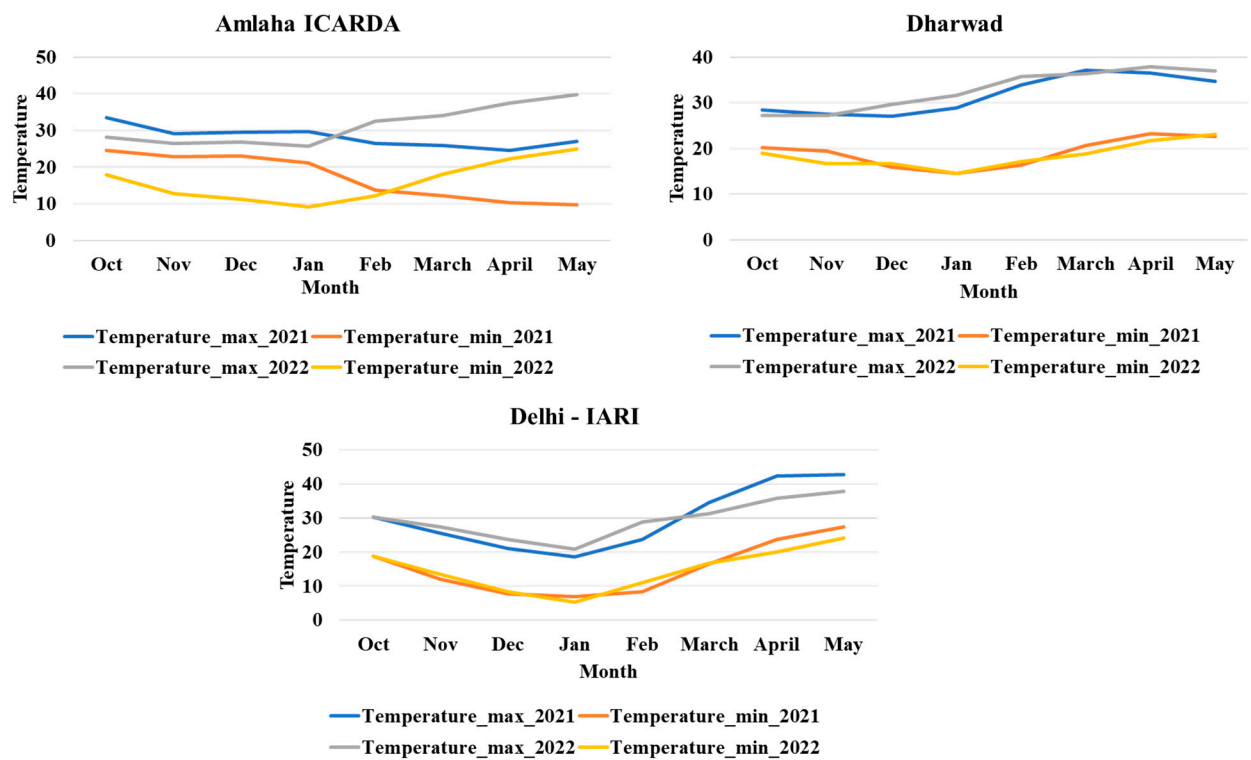

Supplementary tables

Supplementary table S1. List of selected genotypes used in this study with their heat susceptibility index values of individual environment.

| S. No. | Accession | Code | Accession Number | Collection/Source | HSI_Amlaha_2021 | HSI_Dharwad_2021 | HSI_Delhi_2021 | HSI_Amlaha_2022 | HSI_Dharwad_2022 | HSI_Delhi_2022 |
|--------|-----------|------|------------------|-------------------|-----------------|------------------|----------------|-----------------|------------------|----------------|
| 1      | IG5871    | G1   | 5871             | Syria             | 0.12            | 0.12             | 0.18           | 0.07            | 0.1              | 0.08           |
| 2      | IG5842    | G2   | 5842             | Jordan            | 0.68            | 0.83             | 0.92           | 0.62            | 0.49             | 0.77           |
| 3      | IG5852    | G3   | 5852             | Jordan            | 1.19            | 1.08             | 0.97           | 1.07            | 1                | 0.83           |
| 4      | IG5856    | G4   | 5856             | Jordan            | 0.88            | 0.86             | 1.93           | 0.75            | 1.02             | 1.32           |
| 5      | IG5858    | G5   | 5858             | Jordan            | 0.57            | 0.41             | 1.28           | 0.48            | 0.61             | 0.63           |
| 6      | IG5861    | G6   | 5861             | Jordan            | 1.38            | 1.67             | 0.49           | 1.44            | 1.4              | 0.69           |
| 7      | IG5862    | G7   | 5862             | Jordan            | 0.83            | 1.03             | 0.37           | 0.87            | 0.76             | 0.6            |
| 8      | IG5863    | G8   | 5863             | Jordan            | 0.82            | 0.92             | 1.7            | 0.66            | 0.88             | 1.02           |
| 9      | IG5865    | G9   | 5865             | Jordan            | 1.33            | 1.43             | 1.09           | 1.22            | 1.51             | 1.27           |
| 10     | IG5866    | G10  | 5866             | Jordan            | 0.99            | 0.92             | 1.06           | 1.21            | 0.92             | 1.41           |
| 11     | IG5868    | G11  | 5868             | Syria             | 0.43            | 0.32             | 1.57           | 0.39            | 0.63             | 0.77           |
| 12     | IG5874    | G12  | 5874             | Syria             | 0.69            | 1.2              | 0.75           | 1.16            | 0.55             | 0.86           |
| 13     | IG5878    | G13  | 5878             | Syria             | 1.42            | 1.5              | 0.32           | 1.31            | 1.25             | 0.69           |
| 14     | IG5884    | G14  | 5884             | Iraq              | 0.84            | 0.85             | 0.88           | 0.67            | 0.86             | 0.82           |
| 15     | IG5886    | G15  | 5886             | Iraq              | 1.14            | 1.38             | 1.61           | 1.24            | 1.3              | 1.29           |
| 16     | IG5895    | G16  | 5895             | Iraq              | 1.18            | 1.31             | 0.6            | 1.15            | 0.83             | 0.85           |
| 17     | IG5896    | G17  | 5896             | Iraq              | 0.88            | 0.94             | 0.45           | 0.87            | 0.59             | 0.67           |
| 18     | IG5904    | G18  | 5904             | Iraq              | 1.04            | 0.55             | 1.32           | 0.59            | 1.12             | 1.22           |
| 19     | IG5905    | G19  | 5905             | Iraq              | 0.42            | 0.33             | 1.83           | 0.23            | 0.47             | 0.95           |
| 20     | IG5909    | G20  | 5909             | Iraq              | 0.78            | 0.73             | 1.49           | 1.25            | 0.84             | 1.94           |
| 21     | IG5980    | G21  | 5980             | Spain             | 1.1             | 0.92             | 1.29           | 0.77            | 1.46             | 0.9            |
| 22     | IG5993    | G22  | 5993             | Greece            | 0.5             | 0.38             | 2.55           | 0.51            | 1.14             | 1.68           |
| 23     | IG5997    | G23  | 5997             | Tunisia           | 1.11            | 1.14             | 1.48           | 0.94            | 1.27             | 1.19           |
| 24     | IG6000    | G24  | 6000             | Tunisia           | 0.64            | 0.41             | 0.98           | 0.95            | 1                | 1.48           |

|    |               |     |        |                    |      |      |      |      |      |      |
|----|---------------|-----|--------|--------------------|------|------|------|------|------|------|
| 25 | IG6001        | G25 | 6001   | Tunisia            | 0.76 | 0.37 | 0.96 | 0.72 | 0.76 | 0.4  |
| 26 | IG6002        | G26 | 6002   | Tunisia            | 1.28 | 0.41 | 0.67 | 1.24 | 1.44 | 0.79 |
| 27 | IG6003        | G27 | 6003   | Tunisia            | 1.47 | 0.5  | 0.94 | 1.14 | 1.43 | 0.83 |
| 28 | IG6006        | G28 | 6006   | Tunisia            | 1.63 | 0.23 | 0.58 | 1.05 | 1.31 | 0.31 |
| 29 | ILC0(Austria) | G29 |        | Austria            | 1.01 | 0.69 | 1.5  | 0.66 | 1.34 | 1.27 |
| 30 | ILC0(Czech)   | G30 | 145219 | Czech republic     | 1.63 | 1.61 | 0.66 | 1.44 | 1.53 | 0.9  |
| 31 | ILC0(Greece)  | G31 | 145218 | Greece             | 0.67 | 0.69 | 1.14 | 0.59 | 0.81 | 0.79 |
| 32 | ILC0(Italy)   | G32 | 145222 | Italy              | 1.29 | 1.29 | 1.26 | 1.16 | 1.33 | 1.21 |
| 33 | ILC0(Latvia)  | G33 | 145228 | Latvia             | 1.38 | 1.2  | 0.56 | 1.12 | 1.07 | 0.6  |
| 34 | ILC0(Russia)  | G34 | 145171 | Russian Federation | 1.77 | 1.97 | 1.29 | 1.7  | 1.72 | 1.28 |
| 35 | ILC10771      | G35 | 126448 | Turkmenistan       | 1.72 | 1.99 | 0.89 | 1.77 | 1.51 | 1.77 |
| 36 | ILC1312       | G36 | 7150   | Cyprus             | 0.44 | 0.71 | 1.42 | 0.53 | 0.79 | 1.03 |
| 37 | ILC1313       | G37 | 7151   | Ethiopia           | 1.32 | 1.33 | 1.46 | 1.5  | 0.54 | 1.68 |
| 38 | ILC184        | G38 | 6022   | Ukraine            | 1.59 | 1.69 | 1.57 | 1.47 | 1.81 | 1.69 |
| 39 | ILC1932       | G39 | 7770   | Jordan             | 0.78 | 0.79 | 0.75 | 0.67 | 0.82 | 0.52 |
| 40 | ILC239        | G40 | 6077   | Ethiopia           | 1.63 | 1.88 | 1.89 | 1.71 | 1.98 | 2.3  |
| 41 | ILC866        | G41 | 69656  | Portugal           | 0.38 | 0.21 | 0.12 | 0.17 | 0.57 | 0.32 |
| 42 | JG14          | G42 | 92944  | Jabalpur, India    | 0.23 | 0.14 | 0.24 | 0.04 | 0.09 | 0.04 |

Supplementary table S2. Genotype rankings in respective tested environments

| Genotype Ranks | E1  | E2  | E3  | E4  | E5  | E6  | E7  | E8  | E9  | E10 | E11 | E12 |
|----------------|-----|-----|-----|-----|-----|-----|-----|-----|-----|-----|-----|-----|
| 1              | G42 | G42 | G42 | G42 | G11 | G42 | G35 | G42 | G42 | G42 | G10 | G42 |
| 2              | G27 | G1  | G21 | G19 | G34 | G41 | G10 | G18 | G27 | G1  | G35 | G1  |
| 3              | G9  | G11 | G9  | G41 | G16 | G17 | G40 | G21 | G9  | G41 | G37 | G28 |
| 4              | G21 | G19 | G40 | G11 | G17 | G16 | G42 | G1  | G26 | G11 | G42 | G41 |
| 5              | G26 | G41 | G14 | G18 | G42 | G1  | G20 | G14 | G1  | G16 | G34 | G26 |
| 6              | G10 | G10 | G19 | G21 | G41 | G12 | G26 | G19 | G34 | G10 | G9  | G17 |

|    |     |     |     |     |     |     |     |     |     |     |     |     |
|----|-----|-----|-----|-----|-----|-----|-----|-----|-----|-----|-----|-----|
| 7  | G11 | G22 | G13 | G1  | G5  | G13 | G21 | G41 | G10 | G2  | G16 | G13 |
| 8  | G19 | G21 | G34 | G14 | G10 | G35 | G13 | G11 | G16 | G17 | G26 | G10 |
| 9  | G34 | G7  | G18 | G22 | G35 | G3  | G9  | G10 | G3  | G12 | G1  | G25 |
| 10 | G16 | G4  | G35 | G4  | G3  | G2  | G37 | G22 | G41 | G19 | G3  | G16 |
| 11 | G3  | G5  | G16 | G5  | G12 | G10 | G3  | G4  | G11 | G7  | G28 | G3  |
| 12 | G7  | G36 | G4  | G10 | G2  | G34 | G18 | G5  | G28 | G3  | G13 | G2  |
| 13 | G1  | G12 | G10 | G36 | G9  | G11 | G27 | G8  | G13 | G5  | G17 | G27 |
| 14 | G13 | G24 | G30 | G3  | G37 | G39 | G16 | G17 | G7  | G27 | G41 | G12 |
| 15 | G4  | G2  | G41 | G17 | G14 | G14 | G14 | G3  | G17 | G14 | G2  | G14 |
| 16 | G38 | G14 | G38 | G7  | G39 | G30 | G12 | G36 | G30 | G36 | G12 | G5  |
| 17 | G18 | G26 | G3  | G20 | G13 | G5  | G34 | G26 | G12 | G25 | G27 | G34 |
| 18 | G28 | G17 | G11 | G2  | G1  | G9  | G28 | G20 | G2  | G26 | G24 | G11 |
| 19 | G30 | G8  | G12 | G8  | G30 | G7  | G4  | G7  | G35 | G24 | G20 | G39 |
| 20 | G23 | G9  | G23 | G9  | G31 | G6  | G17 | G27 | G14 | G9  | G14 | G7  |
| 21 | G17 | G18 | G7  | G12 | G29 | G37 | G30 | G25 | G21 | G4  | G30 | G30 |
| 22 | G41 | G25 | G6  | G23 | G36 | G31 | G38 | G2  | G19 | G37 | G25 | G9  |
| 23 | G14 | G20 | G15 | G16 | G6  | G33 | G11 | G28 | G24 | G28 | G40 | G6  |
| 24 | G22 | G16 | G17 | G13 | G7  | G36 | G24 | G16 | G4  | G31 | G11 | G35 |
| 25 | G12 | G3  | G22 | G31 | G32 | G29 | G7  | G9  | G5  | G13 | G5  | G37 |
| 26 | G6  | G27 | G1  | G15 | G22 | G32 | G22 | G24 | G23 | G8  | G22 | G31 |
| 27 | G8  | G23 | G36 | G29 | G4  | G18 | G6  | G12 | G36 | G18 | G7  | G36 |
| 28 | G2  | G31 | G8  | G33 | G8  | G23 | G19 | G23 | G18 | G22 | G18 | G33 |
| 29 | G37 | G13 | G5  | G30 | G33 | G8  | G8  | G13 | G25 | G23 | G36 | G8  |
| 30 | G24 | G15 | G2  | G32 | G18 | G15 | G41 | G31 | G22 | G21 | G4  | G24 |
| 31 | G5  | G37 | G20 | G37 | G23 | G4  | G5  | G15 | G38 | G34 | G39 | G18 |
| 32 | G35 | G6  | G37 | G38 | G15 | G19 | G15 | G29 | G31 | G35 | G6  | G4  |
| 33 | G20 | G29 | G33 | G6  | G19 | G26 | G23 | G37 | G8  | G39 | G31 | G32 |
| 34 | G25 | G32 | G32 | G40 | G38 | G25 | G1  | G33 | G32 | G20 | G29 | G29 |
| 35 | G40 | G38 | G31 | G39 | G20 | G22 | G25 | G32 | G6  | G30 | G8  | G23 |
| 36 | G36 | G33 | G29 | G26 | G25 | G38 | G36 | G30 | G37 | G33 | G32 | G19 |
| 37 | G15 | G28 | G39 | G28 | G21 | G27 | G2  | G38 | G29 | G32 | G23 | G15 |
| 38 | G32 | G30 | G27 | G27 | G26 | G28 | G32 | G6  | G15 | G15 | G15 | G22 |
| 39 | G33 | G39 | G26 | G24 | G27 | G21 | G33 | G40 | G33 | G6  | G33 | G21 |
| 40 | G31 | G34 | G28 | G25 | G40 | G20 | G31 | G39 | G40 | G29 | G19 | G20 |
| 41 | G29 | G40 | G24 | G34 | G28 | G40 | G29 | G34 | G20 | G38 | G38 | G38 |
| 42 | G39 | G35 | G25 | G35 | G24 | G24 | G39 | G35 | G39 | G40 | G21 | G40 |

Supplementary table S3. Annichiarico environmental index

| Environment | Mean  | CV (%) | MSE    | H <sup>2</sup> | Winning genotype | Annichiarico environmental index | Class        |
|-------------|-------|--------|--------|----------------|------------------|----------------------------------|--------------|
| E1          | 228.2 | 24.1   | 3036.8 | 80.5           | G42              | 53.73                            | favourable   |
| E2          | 114.4 | 26.6   | 928.0  | 93.0           | G42              | -60.11                           | unfavourable |



|     |       |      |         |      |     |        |              |
|-----|-------|------|---------|------|-----|--------|--------------|
| E3  | 202.1 | 31.7 | 4111.6  | 80.8 | G42 | 27.62  | favourable   |
| E4  | 110.5 | 31.7 | 1224.8  | 92.0 | G42 | -64.02 | unfavourable |
| E5  | 206.4 | 23.5 | 2351.3  | 91.9 | G11 | 31.90  | favourable   |
| E6  | 145.5 | 32.7 | 2268.7  | 89.2 | G42 | -29.00 | unfavourable |
| E7  | 240.6 | 45.5 | 11991.6 | 47.8 | G35 | 66.04  | favourable   |
| E8  | 110.5 | 34.7 | 1469.6  | 87.1 | G42 | -64.01 | unfavourable |
| E9  | 205.3 | 31.7 | 4231.6  | 61.1 | G42 | 30.77  | favourable   |
| E10 | 118.8 | 45.0 | 2858.9  | 73.4 | G42 | -55.68 | unfavourable |
| E11 | 257.4 | 44.4 | 13045.8 | 34.9 | G10 | 82.93  | favourable   |
| E12 | 154.3 | 39.7 | 3759.5  | 73.9 | G42 | -20.17 | unfavourable |

Supplementary table S4. Descriptive statistics, variance components, and genetic parameters for grain yield of 42 genotypes evaluated across the year and locations

|                                       |          |
|---------------------------------------|----------|
| Maximum                               | 808      |
| Minimum                               | 10.219   |
| Grand Mean                            | 174.5151 |
| Standard Error of Mean (SEm)          | 56.3282  |
| Critical Difference (CD) 5%           | 156.2597 |
| Critical Difference (CD) 1%           | 205.4579 |
| Environmental Variance                | 9518.592 |
| Genotypic Variance                    | 26454.03 |
| Phenotypic Variance                   | 35972.62 |
| Environmental Coefficient of Variance | 55.9054  |
| Genotypic Coefficient of Variance     | 93.1994  |
| Phenotypic Coefficient of Variance    | 108.6809 |
| Heritability (Broad Sense)            | 0.7354   |
| Genetic Advance                       | 287.3247 |
| Genetic Advance as percentage of mean | 164.6418 |

Supplementary table S5. Genotype code and their yield across environments with their IPCA scores

| Code | Yield | PC1   | PC2   | PC3   | PC4   | PC5   | PC6   | PC7   |
|------|-------|-------|-------|-------|-------|-------|-------|-------|
| G1   | 241.3 | -1.67 | -4.13 | 5.99  | -1.08 | -1.89 | 4.60  | -0.68 |
| G2   | 186.5 | -4.67 | -1.92 | 2.08  | -0.25 | 0.79  | 1.59  | -0.90 |
| G3   | 214.4 | -2.41 | 1.64  | -0.44 | 1.74  | 0.05  | -1.59 | 0.56  |
| G4   | 170.4 | 3.39  | -2.38 | -2.72 | -0.15 | 1.75  | -0.09 | -1.80 |
| G5   | 186.5 | -3.65 | -3.26 | 0.08  | -1.30 | 1.47  | -2.91 | 1.55  |
| G6   | 142.6 | -2.29 | 0.39  | -1.70 | 2.18  | -2.78 | 0.45  | 1.90  |
| G7   | 181.6 | 0.01  | -2.20 | 0.51  | 2.22  | -0.73 | 2.63  | 2.26  |
| G8   | 147   | 1.55  | -2.58 | -0.85 | -1.06 | 0.57  | -0.98 | 0.19  |
| G9   | 219.3 | -0.07 | 2.97  | -2.69 | 5.84  | 2.52  | 0.82  | -2.28 |
| G10  | 258.3 | -0.06 | 7.34  | -0.45 | -3.40 | 3.12  | -0.62 | 0.09  |
| G11  | 231.6 | -2.57 | -8.94 | -0.87 | 1.27  | 6.67  | -1.41 | 3.44  |
| G12  | 200.1 | -3.90 | 0.18  | -1.01 | -0.39 | -0.70 | 2.04  | 2.52  |

|     |       |        |        |        |       |       |       |       |
|-----|-------|--------|--------|--------|-------|-------|-------|-------|
| G13 | 198.6 | -2.11  | 3.31   | -1.95  | 2.19  | -3.96 | -1.06 | 1.25  |
| G14 | 206.2 | -1.12  | -1.17  | -2.65  | -1.72 | -1.88 | -3.23 | -0.38 |
| G15 | 120   | 0.75   | -1.38  | -2.66  | -0.28 | -1.07 | 0.76  | -0.88 |
| G16 | 222.7 | -4.36  | 1.93   | -0.73  | 2.59  | -0.59 | 0.68  | 1.85  |
| G17 | 207.9 | -5.59  | -0.45  | 0.56   | 0.18  | -1.20 | -0.67 | 3.05  |
| G18 | 178.4 | 3.96   | -2.08  | -3.65  | -2.25 | -0.88 | -4.85 | -1.20 |
| G19 | 181   | 6.70   | -7.25  | -2.21  | -0.01 | 2.21  | 2.80  | -0.13 |
| G20 | 138.6 | 5.65   | 2.58   | -2.12  | -6.83 | 0.07  | -0.01 | 1.90  |
| G21 | 172.4 | 10.13  | -3.51  | -6.05  | 3.07  | -1.67 | -2.11 | 1.84  |
| G22 | 155.5 | 2.97   | -3.15  | -1.49  | -2.84 | 4.63  | -1.14 | -2.83 |
| G23 | 141.7 | 1.78   | -2.17  | -1.80  | 1.60  | 0.29  | 0.66  | -1.33 |
| G24 | 120.6 | 4.76   | 1.34   | 6.30   | -3.32 | 1.81  | 3.18  | 0.17  |
| G25 | 125.8 | 2.41   | 0.19   | 7.82   | -2.58 | -2.09 | 0.67  | -0.59 |
| G26 | 169.1 | 6.71   | 5.81   | 7.85   | 1.57  | 0.43  | -1.77 | 2.86  |
| G27 | 168.7 | 7.68   | 4.27   | 8.73   | 6.69  | 2.80  | -0.78 | 1.66  |
| G28 | 140.6 | 3.65   | 4.14   | 8.79   | -0.75 | -4.43 | -3.16 | -4.00 |
| G29 | 109.3 | -3.64  | -2.82  | 1.02   | -0.95 | 1.77  | -1.27 | -1.52 |
| G30 | 166.4 | -2.91  | 1.97   | -2.11  | 3.66  | -2.21 | -0.08 | -1.47 |
| G31 | 132   | -3.57  | -3.15  | 1.92   | -0.68 | 0.54  | -0.06 | 0.18  |
| G32 | 119   | -1.73  | -1.51  | -0.38  | 0.67  | 0.11  | 0.11  | -0.81 |
| G33 | 115.7 | -2.27  | -2.45  | -0.58  | 0.54  | -2.81 | -0.49 | 0.90  |
| G34 | 191.5 | -5.05  | 5.81   | -1.70  | 6.38  | 2.41  | 0.69  | -4.16 |
| G35 | 199.6 | -4.19  | 12.28  | -4.27  | -3.53 | 0.45  | 1.10  | 0.13  |
| G36 | 156.8 | -0.68  | -3.47  | -0.09  | -1.45 | 1.06  | 0.90  | -1.75 |
| G37 | 172   | -3.54  | 5.94   | -0.22  | -4.61 | 3.78  | 0.32  | -0.04 |
| G38 | 115.2 | 4.44   | 0.00   | -3.95  | 4.02  | -1.03 | 1.68  | -0.27 |
| G39 | 108   | -8.57  | -2.49  | 3.83   | -1.55 | -1.10 | -1.04 | 0.40  |
| G40 | 122.2 | 6.05   | 6.41   | -8.10  | -3.14 | -3.29 | 2.80  | 0.23  |
| G41 | 233.7 | -4.77  | -4.18  | 0.99   | -0.94 | -2.73 | -0.76 | -0.90 |
| G42 | 360.9 | 2.76   | -5.98  | 0.96   | -1.34 | -2.26 | 1.59  | -1.02 |
| E1  | 228.2 | 9.42   | 2.17   | 1.80   | 10.82 | 4.11  | -0.91 | 2.00  |
| E2  | 114.4 | 4.99   | -8.45  | 2.78   | -3.93 | 4.25  | 5.34  | 3.18  |
| E3  | 202.1 | 1.37   | -1.90  | -17.04 | 3.24  | -4.13 | 3.84  | -4.43 |
| E4  | 110.5 | 3.57   | -10.43 | -3.69  | -4.80 | 0.61  | -3.21 | -2.04 |
| E5  | 206.4 | -16.84 | -0.97  | -4.67  | 1.43  | 7.45  | -3.45 | 0.81  |
| E6  | 145.5 | -13.54 | -0.35  | -1.03  | 1.96  | -5.37 | 0.88  | 4.75  |
| E7  | 240.6 | 9.08   | 14.64  | -6.73  | -4.32 | -2.08 | -2.20 | 5.09  |
| E8  | 110.5 | 6.23   | -7.25  | 1.77   | -4.44 | -0.73 | -5.98 | -0.87 |
| E9  | 205.3 | 3.00   | 2.48   | 5.90   | 8.45  | 1.26  | 0.07  | -3.19 |
| E10 | 118.8 | 0.08   | -4.45  | 5.84   | -2.40 | -0.76 | 5.28  | 1.49  |
| E11 | 257.4 | -3.75  | 14.02  | 4.38   | -7.10 | 3.83  | 2.21  | -5.01 |
| E12 | 154.3 | -3.61  | 0.50   | 10.70  | 1.08  | -8.44 | -1.87 | -1.77 |

IPCA, Interaction principal component axis.



Supplementary table S6. Genotypes mean yield with different Stability indices for ranking genotypes under multi-environmental condition

| S. No | GEN    | GE N | Y      | CV    | Shuk la | Ecovel ence | R <sup>2</sup> | AST AB | A SI | AS V  | AVA MGE | DA     | D Z  | E V  | FA         | MA SI | MA SV | SI PC | Z A  | WA AS | WAA SB | HM GV  | RP GV | HMRP GV |
|-------|--------|------|--------|-------|---------|-------------|----------------|--------|------|-------|---------|--------|------|------|------------|-------|-------|-------|------|-------|--------|--------|-------|---------|
| 1     | IG5871 | G1   | 241.34 | 18.69 | 3655.56 | 117674.05   | 0.09           | 56.87  | 1.33 | 4.61  | 509.28  | 187.63 | 0.31 | 0.02 | 35203.89   | 1.86  | 19.04 | 12.86 | 0.13 | 3.39  | 2.54   | 231.98 | 1.44  | 1.38    |
| 2     | IG5842 | G2   | 186.52 | 31.19 | 2032.06 | 66649.95    | 0.47           | 65.61  | 2.12 | 7.34  | 499.74  | 201.53 | 0.34 | 0.03 | 40614.16   | 2.14  | 10.42 | 11.25 | 0.10 | 2.67  | 2.03   | 230.02 | 1.45  | 1.45    |
| 3     | IG5852 | G3   | 214.36 | 34.12 | 673.32  | 23946.44    | 0.91           | 32.04  | 1.66 | 5.75  | 402.57  | 147.05 | 0.22 | 0.01 | 21625.08   | 1.67  | 7.70  | 9.51  | 0.10 | 2.77  | 2.22   | 219.04 | 1.37  | 1.32    |
| 4     | IG5856 | G4   | 170.43 | 35.35 | 1639.99 | 54327.57    | 0.57           | 16.42  | 1.38 | 4.80  | 302.90  | 110.13 | 0.15 | 0.01 | 12128.54   | 1.40  | 5.70  | 5.49  | 0.06 | 1.80  | 1.37   | 180.99 | 1.15  | 1.14    |
| 5     | IG5858 | G5   | 186.48 | 25.80 | 1830.11 | 60302.94    | 0.44           | 23.98  | 1.21 | 4.20  | 377.68  | 120.98 | 0.21 | 0.01 | 14635.61   | 1.29  | 8.08  | 9.56  | 0.09 | 2.45  | 1.88   | 168.80 | 1.11  | 1.09    |
| 6     | IG5861 | G6   | 142.55 | 47.82 | 949.54  | 32627.82    | 0.80           | 12.63  | 0.52 | 1.80  | 239.24  | 83.82  | 0.16 | 0.01 | 7025.07    | 0.79  | 8.46  | 6.66  | 0.06 | 1.54  | 1.21   | 191.86 | 1.20  | 1.18    |
| 7     | IG5862 | G7   | 181.60 | 24.84 | 578.04  | 20951.93    | 0.79           | 9.64   | 0.48 | 1.66  | 206.35  | 76.97  | 0.13 | 0.00 | 5924.96    | 0.75  | 8.31  | 5.07  | 0.05 | 1.35  | 1.03   | 101.74 | 0.68  | 0.66    |
| 8     | IG5863 | G8   | 146.99 | 29.01 | 666.21  | 23723.14    | 0.77           | 29.90  | 1.64 | 5.69  | 393.23  | 139.21 | 0.23 | 0.01 | 19379.00   | 1.66  | 6.84  | 9.60  | 0.09 | 2.62  | 1.93   | 197.19 | 1.26  | 1.25    |
| 9     | IG5865 | G9   | 219.31 | 44.25 | 2232.36 | 72944.96    | 0.92           | 31.80  | 1.98 | 6.88  | 428.44  | 154.45 | 0.21 | 0.01 | 23856.30   | 1.99  | 7.10  | 6.78  | 0.08 | 2.41  | 1.80   | 189.65 | 1.20  | 1.18    |
| 10    | IG5866 | G10  | 258.29 | 42.95 | 4029.01 | 129411.24   | 0.88           | 38.37  | 1.52 | 5.29  | 490.62  | 155.86 | 0.25 | 0.02 | 24293.42   | 1.73  | 12.56 | 11.94 | 0.12 | 3.17  | 2.37   | 162.37 | 1.04  | 1.00    |
| 11    | IG5868 | G11  | 231.57 | 26.14 | 3213.49 | 103780.43   | 0.28           | 102.33 | 3.16 | 10.97 | 821.08  | 269.00 | 0.38 | 0.04 | 72359.46   | 3.20  | 14.32 | 16.16 | 0.19 | 5.31  | 3.89   | 166.47 | 1.09  | 1.00    |
| 12    | IG5874 | G12  | 200.11 | 32.81 | 1253.60 | 42183.91    | 0.70           | 29.86  | 1.74 | 6.05  | 383.93  | 146.54 | 0.20 | 0.01 | 21475.37   | 1.80  | 8.88  | 8.92  | 0.10 | 2.87  | 2.10   | 171.87 | 1.08  | 1.07    |
| 13    | IG5878 | G13  | 198.65 | 43.44 | 1708.18 | 56470.78    | 0.85           | 89.78  | 2.14 | 7.41  | 616.42  | 216.90 | 0.44 | 0.05 | 47045.11   | 2.24  | 12.15 | 17.19 | 0.15 | 3.97  | 2.87   | 115.65 | 0.79  | 0.73    |
| 14    | IG5884 | G14  | 206.17 | 26.34 | 838.64  | 29142.21    | 0.73           | 160.94 | 3.73 | 12.93 | 1039.47 | 332.20 | 0.49 | 0.06 | 11035.9.70 | 3.96  | 22.80 | 22.75 | 0.24 | 6.58  | 4.79   | 144.96 | 1.01  | 0.89    |
| 15    | IG5886 | G15  | 120.03 | 44.97 | 542.10  | 19822.59    | 0.81           | 29.02  | 1.39 | 4.82  | 408.18  | 131.99 | 0.23 | 0.01 | 17421.75   | 1.44  | 7.68  | 10.45 | 0.10 | 2.67  | 2.08   | 139.27 | 0.91  | 0.87    |

|    |                   |         |            |           |              |               |          |            |          |           |             |            |          |          |               |      |           |           |          |      |      |            |      |      |
|----|-------------------|---------|------------|-----------|--------------|---------------|----------|------------|----------|-----------|-------------|------------|----------|----------|---------------|------|-----------|-----------|----------|------|------|------------|------|------|
| 16 | IG5895            | G1<br>6 | 222.<br>73 | 36.7<br>8 | 1850.<br>52  | 60944.2<br>7  | 0.<br>77 | 13.70      | 0.<br>89 | 3.0<br>9  | 264.02      | 91.5<br>0  | 0.<br>16 | 0.<br>01 | 8371.9<br>3   | 0.98 | 6.72      | 7.3<br>5  | 0.<br>07 | 1.89 | 1.38 | 126.2<br>3 | 0.81 | 0.80 |
| 17 | IG5896            | G1<br>7 | 207.<br>94 | 32.7<br>1 | 2365.<br>10  | 77116.8<br>3  | 0.<br>50 | 75.16      | 1.<br>73 | 5.9<br>9  | 623.89      | 213.<br>03 | 0.<br>36 | 0.<br>03 | 45382.<br>30  | 2.22 | 20.2<br>7 | 15.<br>72 | 0.<br>15 | 3.94 | 2.94 | 95.11      | 0.69 | 0.61 |
| 18 | IG5904            | G1<br>8 | 178.<br>38 | 36.1<br>5 | 2624.<br>99  | 85284.7<br>8  | 0.<br>42 | 73.66      | 0.<br>86 | 2.9<br>7  | 584.51      | 206.<br>61 | 0.<br>36 | 0.<br>03 | 42689.<br>17  | 1.91 | 23.9<br>4 | 13.<br>01 | 0.<br>11 | 3.00 | 2.24 | 103.7<br>6 | 0.73 | 0.66 |
| 19 | IG5905            | G1<br>9 | 181.<br>01 | 39.0<br>3 | 7075.<br>23  | 225149.<br>44 | 0.<br>02 | 142.9<br>3 | 2.<br>91 | 10.<br>08 | 909.63      | 306.<br>58 | 0.<br>47 | 0.<br>06 | 93990.<br>72  | 3.37 | 26.3<br>2 | 21.<br>94 | 0.<br>23 | 6.30 | 4.57 | 131.4<br>8 | 0.94 | 0.84 |
| 20 | IG5909            | G2<br>0 | 138.<br>58 | 65.4<br>7 | 4478.<br>53  | 143538.<br>77 | 0.<br>48 | 198.1<br>5 | 2.<br>99 | 10.<br>36 | 944.66      | 341.<br>84 | 0.<br>61 | 0.<br>09 | 11685<br>1.18 | 3.57 | 29.3<br>4 | 27.<br>37 | 0.<br>25 | 6.79 | 4.96 | 129.1<br>1 | 0.94 | 0.83 |
| 21 | IG5980            | G2<br>1 | 172.<br>39 | 62.8<br>2 | 10615<br>.51 | 336415.<br>32 | 0.<br>15 | 108.3<br>3 | 1.<br>76 | 6.1<br>0  | 766.37      | 259.<br>61 | 0.<br>42 | 0.<br>04 | 67399.<br>01  | 2.60 | 27.5<br>0 | 17.<br>33 | 0.<br>17 | 4.77 | 3.61 | 105.5<br>8 | 0.79 | 0.69 |
| 22 | IG5993            | G2<br>2 | 155.<br>46 | 36.8<br>0 | 2175.<br>95  | 71171.9<br>6  | 0.<br>43 | 23.17      | 1.<br>53 | 5.2<br>9  | 361.53      | 127.<br>71 | 0.<br>18 | 0.<br>01 | 16308.<br>84  | 1.54 | 6.67      | 8.4<br>4  | 0.<br>09 | 2.57 | 1.92 | 93.88      | 0.63 | 0.61 |
| 23 | IG5997            | G2<br>3 | 141.<br>73 | 37.6<br>0 | 745.5<br>2   | 26215.5<br>3  | 0.<br>75 | 11.67      | 0.<br>97 | 3.3<br>8  | 238.59      | 85.4<br>7  | 0.<br>14 | 0.<br>01 | 7305.9<br>7   | 0.99 | 4.27      | 6.2<br>2  | 0.<br>06 | 1.66 | 1.23 | 192.4<br>2 | 1.22 | 1.21 |
| 24 | IG6000            | G2<br>4 | 120.<br>59 | 68.2<br>4 | 4587.<br>22  | 146954.<br>91 | 0.<br>35 | 30.21      | 1.<br>18 | 4.0<br>8  | 363.60      | 127.<br>23 | 0.<br>25 | 0.<br>02 | 16186.<br>48  | 1.29 | 8.59      | 10.<br>65 | 0.<br>09 | 2.49 | 1.86 | 132.2<br>3 | 0.92 | 0.88 |
| 25 | IG6001            | G2<br>5 | 125.<br>78 | 57.3<br>4 | 4202.<br>70  | 134869.<br>82 | 0.<br>27 | 26.84      | 1.<br>56 | 5.4<br>0  | 394.57      | 136.<br>66 | 0.<br>20 | 0.<br>01 | 18676.<br>10  | 1.61 | 8.42      | 9.3<br>2  | 0.<br>10 | 2.83 | 2.07 | 120.1<br>6 | 0.77 | 0.76 |
| 26 | IG6002            | G2<br>6 | 169.<br>15 | 71.8<br>3 | 9071.<br>10  | 287876.<br>92 | 0.<br>46 | 5.86       | 0.<br>75 | 2.6<br>0  | 162.33      | 63.5<br>1  | 0.<br>09 | 0.<br>00 | 4032.8<br>9   | 0.76 | 3.21      | 4.2<br>9  | 0.<br>05 | 1.27 | 0.93 | 99.86      | 0.67 | 0.66 |
| 27 | IG6003            | G2<br>7 | 168.<br>66 | 76.8<br>6 | 11355<br>.32 | 359666.<br>52 | 0.<br>39 | 11.78      | 1.<br>07 | 3.7<br>1  | 241.41      | 90.8<br>1  | 0.<br>13 | 0.<br>00 | 8246.6<br>1   | 1.08 | 4.66      | 5.8<br>4  | 0.<br>06 | 1.80 | 1.38 | 98.38      | 0.66 | 0.64 |
| 28 | IG6006            | G2<br>8 | 140.<br>60 | 74.7<br>8 | 7167.<br>14  | 228038.<br>08 | 0.<br>38 | 102.8<br>3 | 2.<br>45 | 8.5<br>0  | 726.74      | 239.<br>98 | 0.<br>46 | 0.<br>05 | 57592.<br>77  | 2.52 | 12.8<br>5 | 18.<br>94 | 0.<br>17 | 4.61 | 3.41 | 135.9<br>3 | 1.03 | 0.94 |
| 29 | ILC0(Au<br>stria) | G2<br>9 | 109.<br>33 | 45.5<br>4 | 1614.<br>00  | 53510.7<br>6  | 0.<br>50 | 199.0<br>5 | 3.<br>85 | 13.<br>31 | 1071.5<br>1 | 361.<br>36 | 0.<br>56 | 0.<br>08 | 13058<br>0.78 | 3.96 | 21.7<br>2 | 24.<br>27 | 0.<br>24 | 6.67 | 4.80 | 137.0<br>1 | 1.06 | 0.94 |
| 30 | ILC0(Cz<br>ech)   | G3<br>0 | 166.<br>37 | 50.3<br>0 | 1602.<br>31  | 53143.2<br>2  | 0.<br>84 | 14.59      | 1.<br>03 | 3.5<br>7  | 282.28      | 96.0<br>7  | 0.<br>16 | 0.<br>01 | 9228.5<br>7   | 1.04 | 4.91      | 5.6<br>8  | 0.<br>05 | 1.46 | 1.10 | 147.5<br>5 | 0.92 | 0.91 |
| 31 | ILC0(Gre<br>ece)  | G3<br>1 | 131.<br>97 | 33.5<br>4 | 1725.<br>38  | 57011.2<br>2  | 0.<br>44 | 69.14      | 2.<br>13 | 7.3<br>6  | 596.50      | 201.<br>58 | 0.<br>36 | 0.<br>03 | 40633.<br>46  | 2.15 | 10.1<br>5 | 14.<br>32 | 0.<br>13 | 3.59 | 2.69 | 138.2<br>3 | 0.95 | 0.91 |
| 32 | ILC0(Ital<br>y)   | G3<br>2 | 119.<br>00 | 41.9<br>5 | 315.7<br>3   | 12708.0<br>5  | 0.<br>87 | 51.46      | 1.<br>57 | 5.4<br>6  | 504.34      | 171.<br>79 | 0.<br>32 | 0.<br>03 | 29511.<br>48  | 1.81 | 13.7<br>3 | 12.<br>41 | 0.<br>11 | 2.92 | 2.16 | 85.38      | 0.63 | 0.57 |
| 33 | ILC0(Lat<br>ivia) | G3<br>3 | 115.<br>74 | 37.6<br>4 | 900.7<br>4   | 31093.9<br>3  | 0.<br>69 | 96.68      | 3.<br>12 | 10.<br>81 | 733.83      | 262.<br>52 | 0.<br>37 | 0.<br>03 | 68918.<br>14  | 3.23 | 16.0<br>7 | 16.<br>44 | 0.<br>18 | 5.04 | 3.68 | 81.39      | 0.62 | 0.54 |
| 34 | ILC0(Ru<br>ssia)  | G3<br>4 | 191.<br>51 | 64.0<br>3 | 5764.<br>80  | 183964.<br>54 | 0.<br>86 | 24.60      | 1.<br>38 | 4.8<br>0  | 404.49      | 129.<br>91 | 0.<br>19 | 0.<br>01 | 16876.<br>12  | 1.50 | 9.75      | 8.6<br>4  | 0.<br>10 | 2.67 | 1.98 | 154.8<br>3 | 0.99 | 0.96 |



|    |              |         |            |            |              |               |          |            |          |          |        |            |          |          |              |      |           |           |          |      |      |            |      |      |
|----|--------------|---------|------------|------------|--------------|---------------|----------|------------|----------|----------|--------|------------|----------|----------|--------------|------|-----------|-----------|----------|------|------|------------|------|------|
| 35 | ILC1077<br>1 | G3<br>5 | 199.<br>64 | 78.1<br>1  | 12434<br>.77 | 393592.<br>16 | 0.<br>81 | 152.9<br>9 | 2.<br>83 | 9.8<br>1 | 833.98 | 311.<br>99 | 0.<br>50 | 0.<br>06 | 97336.<br>18 | 3.34 | 27.1<br>2 | 23.<br>69 | 0.<br>23 | 6.41 | 4.72 | 75.36      | 0.64 | 0.52 |
| 36 | ILC1312      | G3<br>6 | 156.<br>77 | 23.0<br>6  | 896.1<br>3   | 30949.1<br>3  | 0.<br>72 | 42.08      | 2.<br>08 | 7.2<br>0 | 488.92 | 172.<br>80 | 0.<br>25 | 0.<br>02 | 29859.<br>81 | 2.09 | 8.66      | 10.<br>88 | 0.<br>12 | 3.41 | 2.56 | 223.1<br>7 | 1.39 | 1.34 |
| 37 | ILC1313      | G3<br>7 | 172.<br>00 | 62.2<br>5  | 4303.<br>28  | 138031.<br>09 | 0.<br>77 | 46.14      | 1.<br>99 | 6.8<br>8 | 503.03 | 176.<br>62 | 0.<br>26 | 0.<br>02 | 31195.<br>95 | 2.00 | 9.22      | 11.<br>04 | 0.<br>12 | 3.23 | 2.44 | 349.2<br>7 | 2.17 | 2.05 |
| 38 | ILC184       | G3<br>8 | 115.<br>18 | 72.5<br>3  | 2794.<br>81  | 90621.9<br>6  | 0.<br>62 | 25.62      | 1.<br>60 | 5.5<br>4 | 374.76 | 133.<br>45 | 0.<br>20 | 0.<br>01 | 17807.<br>68 | 1.60 | 6.37      | 8.2<br>9  | 0.<br>09 | 2.52 | 1.89 | 175.7<br>1 | 1.09 | 1.08 |
| 39 | ILC1932      | G3<br>9 | 107.<br>97 | 74.4<br>7  | 6552.<br>17  | 208710.<br>38 | 0.<br>13 | 13.04      | 0.<br>82 | 2.8<br>4 | 241.65 | 85.8<br>4  | 0.<br>16 | 0.<br>01 | 7368.1<br>6  | 0.91 | 6.27      | 6.5<br>6  | 0.<br>06 | 1.56 | 1.22 | 114.5<br>5 | 0.80 | 0.76 |
| 40 | ILC239       | G4<br>0 | 122.<br>17 | 107.<br>89 | 9589.<br>72  | 304176.<br>21 | 0.<br>60 | 10.05      | 0.<br>64 | 2.2<br>0 | 179.34 | 71.6<br>0  | 0.<br>15 | 0.<br>01 | 5126.2<br>9  | 0.67 | 3.99      | 4.9<br>5  | 0.<br>04 | 0.98 | 0.77 | 168.8<br>9 | 1.06 | 1.05 |
| 41 | ILC8666      | G4<br>1 | 233.<br>70 | 20.5<br>1  | 3130.<br>18  | 101162.<br>24 | 0.<br>18 | 10.91      | 0.<br>93 | 3.2<br>1 | 261.72 | 84.4<br>9  | 0.<br>13 | 0.<br>00 | 7138.1<br>8  | 0.95 | 4.81      | 6.0<br>4  | 0.<br>06 | 1.67 | 1.24 | 135.4<br>7 | 0.86 | 0.85 |
| 42 | JG14         | G4<br>2 | 360.<br>86 | 8.36       | 3092.<br>72  | 99984.7<br>3  | 0.<br>07 | 50.13      | 0.<br>86 | 2.9<br>8 | 465.53 | 147.<br>69 | 0.<br>35 | 0.<br>03 | 21813.<br>54 | 1.12 | 10.7<br>5 | 11.<br>57 | 0.<br>08 | 2.02 | 1.55 | 188.9<br>0 | 1.22 | 1.21 |

Y, Yield; CV, Coefficient of Variation; R<sup>2</sup>, Pinthus's (1973) coefficients of determination; ASTAB, AMMI-based stability parameter; ASI, AMMI Stability Index; ASV, AMMI stability value; AMGE, sum across environments of genotype × environment interaction (GEI) modelled by AMMI; AVAMGE, sum across environments of the absolute value of GEI modelled by AMMI; DA, Annicchiarico's D parameter; DZ, Zhang's D parameter; EV, averages of the squared eigenvector values; FA, stability measure based on fitted AMMI model; MASI, Modified AMMI Stability Index; MASV, modified AMMI stability value; SIPC, sums of the absolute value of the IPC scores; Za, absolute value of the relative contribution of IPCs to the interaction; WAAS, weighted average of absolute scores; WAASB, weighted average of absolute scores for the best linear unbiased predictions (BLUPs) of the genotype-vs.- environment interaction; HMGV, harmonic mean of genotypic values; RPGV-relative performance of genotypic values; HMRPGV, harmonic mean of relative performance of genotypic values.

Supplementary table S7. Environmental description of the experimental sites.

| Location       | Code | Latitude | Longitude | Altitude | Year | Date of sowing | Date of harvesting |
|----------------|------|----------|-----------|----------|------|----------------|--------------------|
| Amlaha_Timely  | E1   | 23.14711 | 76.92035  | 502 m    | 2021 | 15-11-2021     | 17-04-2022         |
| Amlaha_Late    | E2   | 23.14711 | 76.92035  | 502 m    | 2021 | 25-12-2021     | 23-04-2022         |
| Dharwad_Timely | E3   | 15.45102 | 75.00844  | 678 m    | 2021 | 27.11.2021     | 08.03.2022         |
| Dharwad_Late   | E4   | 15.45102 | 75.00844  | 678 m    | 2021 | 27-12-2021     | 25.03.2022         |
| Delhi_Timely   | E5   | 28.08    | 77.12     | 228.61m  | 2021 | 27-11-2021     | 10-04-2022         |
| Delhi_Late     | E6   | 28.08    | 77.12     | 228.61m  | 2021 | 27-12-2021     | 28-04-2022         |
| Amlaha_Timely  | E7   | 23.14711 | 76.92035  | 502 m    | 2022 | 10-11-2022     | 16-04-2023         |
| Amlaha_Late    | E8   | 23.14711 | 76.92035  | 502 m    | 2022 | 22-12-2022     | 23-04-2023         |
| Dharwad_Timely | E9   | 15.45102 | 75.00844  | 678 m    | 2022 | 14.12.2022     | 25.03.2023         |
| Dharwad_Late   | E10  | 15.45102 | 75.00844  | 678 m    | 2022 | 15-01-20223    | 17-04-2023         |
| Delhi_Timely   | E11  | 28.08    | 77.12     | 228.61m  | 2022 | 27-11-2022     | 23-04-2023         |
| Delhi_Late     | E12  | 28.08    | 77.12     | 228.61m  | 2022 | 27-12-2022     | 05-05-2023         |

Supplementary table S8. Mean monthly temperature and precipitation data of all the locations

|          | Amlaha      |          |                        | Dharwad     |          |                        | Delhi       |          |                        |
|----------|-------------|----------|------------------------|-------------|----------|------------------------|-------------|----------|------------------------|
|          | Temperature |          |                        | Temperature |          |                        | Temperature |          |                        |
| 2021-22  | Max (°C)    | Min (°C) | Precipitation (mm/day) | Max (°C)    | Min (°C) | Precipitation (mm/day) | Max (°C)    | Min (°C) | Precipitation (mm/day) |
| October  | 33.49       | 24.52    | 5.55                   | 28.38       | 20.22    | 3.96                   | 30.34       | 18.85    | 2.5                    |
| November | 29.03       | 22.85    | 11.11                  | 27.52       | 19.43    | 3.53                   | 25.62       | 12.11    | 0                      |
| December | 29.43       | 23.12    | 8.11                   | 27.1        | 15.88    | 1.08                   | 21.09       | 7.7      | 0.18                   |
| January  | 29.59       | 21.06    | 3.02                   | 28.92       | 14.46    | 0                      | 18.62       | 6.87     | 2.79                   |
| February | 26.38       | 13.63    | 0.01                   | 33.9        | 16.3     | 0                      | 23.67       | 8.37     | 0.76                   |
| March    | 25.84       | 12.2     | 0.1                    | 37.15       | 20.69    | 0.34                   | 34.51       | 16.49    | 0                      |
| April    | 24.65       | 10.38    | 1.03                   | 36.56       | 23.17    | 1.74                   | 42.26       | 23.76    | 0.02                   |
| May      | 27.09       | 9.64     | 0.03                   | 34.69       | 22.66    | 3.37                   | 42.74       | 27.41    | 1.31                   |
| 2022-23  |             |          |                        |             |          |                        |             |          |                        |
| October  | 28.14       | 17.83    | 3.58                   | 27.22       | 18.89    | 3.38                   | 30.31       | 18.85    | 3.09                   |
| November | 26.47       | 12.77    | 0                      | 27.12       | 16.66    | 0.12                   | 27.38       | 13.41    | 0                      |
| December | 26.86       | 11.34    | 0.19                   | 29.69       | 16.6     | 0.31                   | 23.74       | 8.33     | 0                      |
| January  | 25.77       | 9.15     | 0.47                   | 31.65       | 14.5     | 0                      | 20.83       | 5.32     | 1.17                   |

|          |       |       |      |       |       |      |       |       |      |
|----------|-------|-------|------|-------|-------|------|-------|-------|------|
| February | 32.53 | 12.25 | 0    | 35.72 | 17.13 | 0    | 28.91 | 11.06 | 0    |
| March    | 33.97 | 18.16 | 0.56 | 36.29 | 18.83 | 0    | 31.31 | 16.77 | 2.07 |
| April    | 37.39 | 22.26 | 1.31 | 37.9  | 21.65 | 0.66 | 35.87 | 20.11 | 0.49 |
| May      | 39.77 | 24.84 | 0.83 | 37.02 | 23.09 | 1.57 | 37.9  | 24.11 | 2.57 |

Supplementary table S9. Mean  $\pm$  Standard deviation of yield traits of individual locations and seasons.

| S. No | GEN    | Code | E1                      | E2                      | E3                      | E4                      | E5                     | E6                      | E7                      | E8                      | E9                     | E10                     | E11                     | E12                     |
|-------|--------|------|-------------------------|-------------------------|-------------------------|-------------------------|------------------------|-------------------------|-------------------------|-------------------------|------------------------|-------------------------|-------------------------|-------------------------|
| 1     | IG5871 | G1   | 257.1<br>1 $\pm$ 62.34  | 241.2<br>5 $\pm$ 62.56  | 208.8<br>4 $\pm$ 16.12  | 211.0<br>8 $\pm$ 16.11  | 213.7<br>5 $\pm$ 12    | 203.5<br>$\pm$ 9.09     | 209.9<br>8 $\pm$ 19.94  | 217.3<br>1 $\pm$ 19.58  | 261.8<br>9 $\pm$ 58.27 | 288.3<br>3 $\pm$ 56.35  | 313.0<br>9 $\pm$ 15.38  | 298.7<br>6 $\pm$ 13     |
| 2     | IG5842 | G2   | 196.7<br>$\pm$ 69.54    | 129.9<br>4 $\pm$ 40.87  | 206.7<br>9 $\pm$ 110.03 | 239.5<br>9 $\pm$ 119.3  | 253 $\pm$<br>96.28     | 176.8<br>3 $\pm$ 104.44 | 184.8<br>3 $\pm$ 117.95 | 233.8<br>3 $\pm$ 122.33 | 259 $\pm$<br>79.18     | 186.8<br>3 $\pm$ 95.5   | 142.9<br>7 $\pm$ 36.3   | 123.5<br>$\pm$ 30.57    |
| 3     | IG5852 | G3   | 266.4<br>9 $\pm$ 76.58  | 108.8<br>1 $\pm$ 13.23  | 164.2<br>8 $\pm$ 127.99 | 212.4<br>8 $\pm$ 122.41 | 278.3<br>3 $\pm$ 30.35 | 204.6<br>6 $\pm$ 99.91  | 223.3<br>3 $\pm$ 116.71 | 214.6<br>6 $\pm$ 112.05 | 279.6<br>6 $\pm$ 30.35 | 210 $\pm$<br>98.83      | 221.0<br>2 $\pm$ 106.57 | 160.6<br>5 $\pm$ 103.47 |
| 4     | IG5856 | G4   | 249.9<br>8 $\pm$ 89.19  | 140.4<br>8 $\pm$ 18.5   | 181.9<br>6 $\pm$ 36.71  | 137.4<br>1 $\pm$ 54.16  | 152.6<br>6 $\pm$ 62.06 | 129.1<br>6 $\pm$ 54.29  | 163.8<br>3 $\pm$ 39.28  | 126.8<br>3 $\pm$ 54.48  | 158 $\pm$<br>71.43     | 138.5<br>$\pm$ 68.29    | 178.6<br>9 $\pm$ 45.77  | 152.2<br>$\pm$ 39.41    |
| 5     | IG5858 | G5   | 193.2<br>5 $\pm$ 77.75  | 138.8<br>6 $\pm$ 42.72  | 157.3<br>3 $\pm$ 96.43  | 184.9<br>7 $\pm$ 88.79  | 203.8<br>5 $\pm$ 60.42 | 139.5<br>2 $\pm$ 60.73  | 162.3<br>3 $\pm$ 95.31  | 176.8<br>5 $\pm$ 95.35  | 209.5<br>2 $\pm$ 48.08 | 149.1<br>9 $\pm$ 58.06  | 137.9<br>6 $\pm$ 48.19  | 118.1<br>3 $\pm$ 37.66  |
| 6     | IG5861 | G6   | 200.8<br>8 $\pm$ 93.57  | 62.88<br>$\pm$ 70.35    | 101.6<br>2 $\pm$ 76.93  | 107.3<br>9 $\pm$ 80.87  | 146.6<br>6 $\pm$ 13.65 | 97.33<br>$\pm$ 75.24    | 99.33<br>$\pm$ 77.35    | 103.6<br>6 $\pm$ 80.4   | 152.6<br>6 $\pm$ 6.8   | 107.3<br>3 $\pm$ 76.77  | 109.0<br>9 $\pm$ 78.12  | 64.69<br>$\pm$ 74.18    |
| 7     | IG5862 | G7   | 257.8<br>1 $\pm$ 43.06  | 151.2<br>1 $\pm$ 30.23  | 186.7<br>4 $\pm$ 60.42  | 169.4<br>9 $\pm$ 41.81  | 208.6<br>6 $\pm$ 26.65 | 183.5<br>$\pm$ 58.44    | 185.1<br>6 $\pm$ 58.75  | 167.1<br>6 $\pm$ 38.94  | 213.3<br>3 $\pm$ 41.52 | 192.1<br>6 $\pm$ 65.54  | 203.3<br>8 $\pm$ 66.57  | 161.9<br>3 $\pm$ 49.22  |
| 8     | IG5863 | G8   | 200.6<br>2 $\pm$ 68.47  | 118.2<br>6 $\pm$ 18.44  | 90.55<br>$\pm$ 58.81    | 94.28<br>$\pm$ 58.14    | 126 $\pm$<br>32.07     | 111 $\pm$<br>21.07      | 130.6<br>6 $\pm$ 20.59  | 115.3<br>3 $\pm$ 31.97  | 134.6<br>6 $\pm$ 42.14 | 131.6<br>6 $\pm$ 40.8   | 164.2<br>$\pm$ 21.94    | 146.9<br>8 $\pm$ 35.03  |
| 9     | IG5865 | G9   | 344.4<br>$\pm$ 42.53    | 115.5<br>6 $\pm$ 70.54  | 224.2<br>4 $\pm$ 137.89 | 177.6<br>$\pm$ 102.35   | 262.6<br>6 $\pm$ 66.49 | 193.1<br>6 $\pm$ 130.25 | 218.5<br>$\pm$ 137.12   | 173.1<br>6 $\pm$ 103.05 | 264 $\pm$<br>74.08     | 198.5<br>$\pm$ 132.56   | 238.1<br>9 $\pm$ 145.08 | 152.1<br>8 $\pm$ 134.19 |
| 10    | IG5866 | G10  | 310.4<br>7 $\pm$ 98.86  | 157.0<br>9 $\pm$ 35.88  | 193.5<br>6 $\pm$ 102.63 | 211.7<br>3 $\pm$ 105.27 | 439 $\pm$<br>294.24    | 380.6<br>6 $\pm$ 348.01 | 399.3<br>3 $\pm$ 338.05 | 219 $\pm$<br>86.75      | 443 $\pm$<br>308.03    | 388.6<br>6 $\pm$ 357.35 | 418.0<br>3 $\pm$ 341.81 | 198.8<br>9 $\pm$ 108.49 |
| 11    | IG5868 | G11  | 296.3<br>3 $\pm$ 110.46 | 233.6<br>2 $\pm$ 115.87 | 205.1<br>5 $\pm$ 74.01  | 232.9<br>5 $\pm$ 74.15  | 227.3<br>3 $\pm$ 83.73 | 153 $\pm$<br>99.18      | 151.6<br>6 $\pm$ 97     | 175.3<br>3 $\pm$ 98.45  | 205.3<br>3 $\pm$ 50.54 | 166.3<br>3 $\pm$ 32.74  | 190.6<br>5 $\pm$ 74.31  | 201.0<br>8 $\pm$ 69.02  |

|    |            |         |                       |                      |                       |                       |                       |                       |                       |                       |                       |                       |                       |                       |
|----|------------|---------|-----------------------|----------------------|-----------------------|-----------------------|-----------------------|-----------------------|-----------------------|-----------------------|-----------------------|-----------------------|-----------------------|-----------------------|
| 12 | IG58<br>74 | G1<br>2 | 203.4<br>±76.9<br>4   | 133.6<br>±41.2<br>3  | 181.4<br>9±10<br>1.9  | 229.7<br>7±98.<br>24  | 259.3<br>3±47.<br>98  | 192.3<br>3±88.<br>29  | 199.6<br>6±98.<br>65  | 220.6<br>6±10<br>7.02 | 264.3<br>3±33.<br>24  | 201.3<br>3±84.<br>94  | 151.8<br>2±67.<br>22  | 113.0<br>9±7.2<br>4   |
| 13 | IG58<br>78 | G1<br>3 | 251.3<br>4±11<br>3.46 | 73.45<br>±34.3<br>4  | 144.5<br>3±12<br>6.04 | 194.8<br>2±13<br>7.42 | 274.6<br>6±9.0<br>7   | 204±<br>115.3<br>1    | 202.6<br>6±11<br>4.27 | 178.6<br>6±97.<br>5   | 251±<br>42.88         | 190.3<br>3±10<br>5.16 | 163.7<br>1±10<br>9.97 | 79.87<br>±43.8<br>3   |
| 14 | IG58<br>84 | G1<br>4 | 211.7<br>6±60.<br>28  | 122.7<br>4±35.<br>39 | 161.3<br>5±10<br>2.25 | 178±<br>102.8<br>2    | 219±<br>44.3          | 167.1<br>6±45.<br>74  | 190.1<br>6±75.<br>75  | 191.1<br>6±75.<br>76  | 224±<br>37.72         | 176.1<br>6±47.<br>54  | 164.1<br>8±45.<br>66  | 122.1<br>8±35.<br>02  |
| 15 | IG58<br>86 | G1<br>5 | 158.1<br>1±61.<br>96  | 68.48<br>±23.8<br>3  | 142.0<br>8±47.<br>55  | 112.1<br>±46.7<br>2   | 131±<br>43            | 95.5±<br>43.61        | 121.8<br>3±54.<br>72  | 100.1<br>6±54.<br>42  | 137±<br>50.38         | 105.5<br>±56.1<br>5   | 111.7<br>1±52.<br>67  | 69.99<br>±26.4<br>9   |
| 16 | IG58<br>95 | G1<br>6 | 266.5<br>4±78.<br>77  | 109.6<br>3±19.<br>21 | 194.5<br>±120.<br>89  | 238.2<br>6±13<br>8.11 | 303±<br>26.05         | 228.6<br>6±11<br>6.03 | 228.6<br>6±11<br>6.03 | 241.6<br>6±12<br>5.3  | 304.3<br>3±16.<br>86  | 234±<br>112.5<br>2    | 190.1<br>6±90.<br>38  | 126.1<br>7±47.<br>41  |
| 17 | IG58<br>96 | G1<br>7 | 213.4<br>3±76.<br>82  | 119.9<br>4±25.<br>16 | 176.6<br>±119.<br>28  | 234±<br>127.3<br>8    | 277±<br>53.01         | 210.1<br>6±95.<br>88  | 208.8<br>3±93.<br>95  | 230.8<br>3±10<br>3.69 | 273±<br>31.48         | 213.1<br>6±84.<br>04  | 162.6<br>3±65.<br>49  | 114.9<br>7±18.<br>13  |
| 18 | IG59<br>04 | G1<br>8 | 235.3<br>±105.<br>13  | 113.3<br>1±34.<br>4  | 134.7<br>1±37.<br>8   | 117.9<br>2±39.<br>2   | 172.3<br>3±78.<br>41  | 154.8<br>3±86.<br>93  | 174.8<br>3±73.<br>53  | 121.5<br>±33.3<br>8   | 177±<br>92.32         | 163.5<br>±98.9<br>9   | 171.1<br>8±91.<br>64  | 104.2<br>6±24.<br>26  |
| 19 | IG59<br>05 | G1<br>9 | 292.3<br>6±10<br>0.78 | 231.8<br>6±48.<br>65 | 212.9<br>7±94.<br>74  | 131.1<br>6±78.<br>2   | 103.5<br>±37.6<br>1   | 90.5±<br>37.35        | 107.8<br>3±27.<br>61  | 82.66<br>±28.2<br>9   | 108.6<br>6±49.<br>64  | 117.8<br>3±53.<br>25  | 163.1<br>8±27<br>26   | 170.9<br>7±27.<br>26  |
| 20 | IG59<br>09 | G2<br>0 | 181.8<br>3±63.<br>98  | 110.1<br>6±23.<br>38 | 86.96<br>±27.8<br>3   | 62.63<br>±26.8<br>9   | 249.6<br>6±34<br>9.41 | 264.1<br>6±33<br>8.14 | 268.8<br>3±33<br>3.54 | 62.83<br>±33.8<br>3   | 253.6<br>6±36<br>3.26 | 272.1<br>6±34<br>9.07 | 298.9<br>5±32<br>3.95 | 103.7<br>4±14.<br>58  |
| 21 | IG59<br>80 | G2<br>1 | 337.0<br>3±13<br>6.16 | 152.6<br>1±76.<br>72 | 102.3<br>3±48.<br>41  | 62.33<br>±30.7<br>3   | 86.33<br>±70.8<br>8   | 102.8<br>3±66.<br>62  | 109.5<br>±56.5<br>2   | 63.83<br>±39.6<br>7   | 92±8<br>7.42          | 112.5<br>±81.0<br>4   | 163.5<br>±41.8<br>1   | 133.1<br>6±43.<br>76  |
| 22 | IG59<br>93 | G2<br>2 | 206.7<br>3±79.<br>61  | 155.2<br>6±69.<br>86 | 166.2<br>5±41.<br>84  | 134.6<br>5±80         | 152.3<br>3±86.<br>07  | 115±<br>68.43         | 167±<br>57.26         | 120.6<br>6±81.<br>61  | 158.6<br>6±94.<br>15  | 125.3<br>3±84.<br>05  | 164.8<br>1±53.<br>09  | 132.6<br>8±31.<br>34  |
| 23 | IG59<br>97 | G2<br>3 | 216.2<br>5±30.<br>79  | 96.5±<br>12.41       | 158.5<br>5±58.<br>65  | 117.9<br>1±43.<br>47  | 135±<br>40.36         | 104.5<br>±37.4<br>1   | 129.1<br>6±46.<br>39  | 108.8<br>3±48.<br>01  | 142±<br>48.86         | 115.5<br>±52.3<br>9   | 152.2<br>6±59.<br>55  | 124.9<br>7±61.<br>95  |
| 24 | IG60<br>00 | G2<br>4 | 194.0<br>8±30.<br>97  | 132.0<br>2±12.<br>57 | 34.13<br>±7.04        | 27.36<br>±5.83        | 117.7<br>9±15<br>7.03 | 144.1<br>2±14<br>1.57 | 216.3<br>3±95.<br>36  | 148.3<br>3±78.<br>11  | 214.6<br>6±10<br>9.87 | 175.3<br>3±11<br>8.15 | 201.7<br>9±98.<br>4   | 141.2<br>9±29.<br>05  |
| 25 | IG60<br>01 | G2<br>5 | 179.6<br>8±27.<br>56  | 111.5<br>5±12.<br>66 | 35.04<br>±9.85        | 35.29<br>±9.76        | 93±9<br>2.89          | 129.6<br>6±86.<br>55  | 187.6<br>6±27.<br>64  | 174.3<br>3±28.<br>36  | 196.6<br>6±32.<br>74  | 182.3<br>3±35.<br>27  | 189.9<br>4±30.<br>13  | 151.4<br>8±39.<br>14  |
| 26 | IG60<br>02 | G2<br>6 | 331.9<br>1±29.<br>54  | 120.0<br>4±22.<br>99 | 50.43<br>±9.11        | 46.47<br>±9.98        | 153.3<br>6±18<br>0.01 | 170.7<br>±168.<br>36  | 242.3<br>3±12<br>6.05 | 167.3<br>3±77.<br>88  | 255±<br>118.5         | 209±<br>142.3<br>1    | 270.3<br>3±13<br>4.56 | 178.6<br>7±12<br>2.81 |
| 27 | IG60<br>03 | G2<br>7 | 407.6<br>2±43.<br>73  | 108.1<br>6±12.<br>75 | 44.81<br>±7.83        | 44.56<br>±7.88        | 116.4<br>3±11<br>8.37 | 128.0<br>9±11<br>0.45 | 206.6<br>6±10<br>3.58 | 194.6<br>6±97.<br>43  | 257±<br>34.69         | 196±<br>91.32         | 255.0<br>5±15<br>0.07 | 198.5<br>9±16<br>9.43 |
| 28 | IG60<br>06 | G2<br>8 | 225.0<br>5±28.<br>18  | 42.39<br>±12.6       | 33.29<br>±5.57        | 35.68<br>±6.28        | 110.2<br>8±12<br>2.93 | 160.1<br>6±10<br>9.38 | 246.4<br>1±54.<br>73  | 247.7<br>4±54.<br>99  | 282.7<br>4±23.<br>04  | 270.1<br>5±20.<br>74  | 251.6<br>1±47.<br>28  | 166.4<br>2±11<br>4.79 |

|    |                   |         |                       |                      |                       |                       |                       |                       |                       |                       |                       |                       |                       |                       |
|----|-------------------|---------|-----------------------|----------------------|-----------------------|-----------------------|-----------------------|-----------------------|-----------------------|-----------------------|-----------------------|-----------------------|-----------------------|-----------------------|
| 29 | ILC0<br>(Austria) | G2<br>9 | 115.0<br>8±39.<br>2   | 57.96<br>±39.1<br>8  | 120.4<br>8±74.<br>09  | 126.7<br>3±72.<br>56  | 129.6<br>6±68.<br>41  | 70.16<br>±48.8<br>8   | 95.83<br>±90.9<br>9   | 112.8<br>3±87.<br>32  | 133.3<br>3±58.<br>24  | 77.83<br>±43.1<br>9   | 62.68<br>±27.8<br>3   | 47.4±<br>21.25        |
| 30 | ILC0<br>(Czech)   | G3<br>0 | 225.0<br>5±28.<br>18  | 42.39<br>±12.6       | 175.9<br>4±10<br>0.98 | 148.4<br>2±81.<br>48  | 197.3<br>3±29.<br>7   | 131.5<br>±95.9<br>7   | 149.1<br>6±10<br>8.94 | 133.5<br>±99.4<br>3   | 202.3<br>3±37.<br>23  | 140.5<br>±100.<br>67  | 154.0<br>4±10<br>7.13 | 90.17<br>±95.7        |
| 31 | ILC0<br>(Greece)  | G3<br>1 | 135.5<br>±29.8<br>1   | 90.48<br>±12.6<br>4  | 145.8<br>4±98.<br>75  | 162.9<br>7±93.<br>09  | 173.3<br>3±78.<br>48  | 110.5<br>±45.2<br>1   | 142.1<br>6±98.<br>28  | 159.5<br>±92.3<br>3   | 170.6<br>6±76.<br>7   | 111.8<br>3±39.<br>49  | 101.0<br>2±22.<br>6   | 96.71<br>±23.2<br>6   |
| 32 | ILC0<br>(Italy)   | G3<br>2 | 155.0<br>6±30.<br>67  | 55.13<br>±12.4<br>6  | 132.4<br>5±72.<br>74  | 122.8<br>7±71.<br>8   | 146.3<br>3±43.<br>98  | 92±5<br>0.31          | 117±<br>79.73         | 113.6<br>6±79.<br>5   | 152.6<br>6±39.<br>52  | 102.3<br>3±55.<br>42  | 110.7<br>8±59.<br>85  | 78.8±<br>52.84        |
| 33 | ILC0<br>(Latvia)  | G3<br>3 | 138.0<br>8±30.<br>63  | 43.61<br>±12.7<br>8  | 125.3<br>6±55.<br>92  | 127.1<br>9±57.<br>13  | 142.3<br>3±31.<br>18  | 94.5±<br>66.63        | 97.16<br>±70.2<br>6   | 111.5<br>±77.3        | 143.3<br>3±22.<br>74  | 99.5±<br>61.86        | 90.27<br>±51.8<br>1   | 65.43<br>±49.6<br>9   |
| 34 | ILC0<br>(Russia)  | G3<br>4 | 276.0<br>9±30.<br>67  | 32.46<br>±12.5<br>5  | 202.2<br>2±16<br>5.98 | 181.6<br>±160.<br>29  | 257.6<br>6±73.<br>81  | 149.1<br>6±12<br>2.24 | 196.5<br>±166.<br>14  | 177.1<br>6±16<br>0.97 | 262.3<br>3±73.<br>11  | 157.8<br>3±12<br>6.3  | 182.1<br>7±14<br>0.92 | 104.1<br>3±13<br>5.17 |
| 35 | ILC1<br>0771      | G3<br>5 | 186.2<br>2±18.<br>12  | 26.91<br>±13.0<br>9  | 158.1<br>5±12<br>8.51 | 162.7<br>5±13<br>0.2  | 419.3<br>3±32<br>1.29 | 334.3<br>3±40<br>3.4  | 357±<br>393.7<br>9    | 159.3<br>3±12<br>9.24 | 423.3<br>3±33<br>5.07 | 339.6<br>6±41<br>5.34 | 340.7<br>9±41<br>4.75 | 79.05<br>±103.<br>41  |
| 36 | ILC1<br>312       | G3<br>6 | 170.6<br>9±24.<br>44  | 133.7<br>8±12.<br>73 | 166.3<br>2±41.<br>46  | 147.6<br>6±45.<br>34  | 145.3<br>3±47.<br>6   | 109±<br>16.37         | 133.3<br>3±55.<br>37  | 135.3<br>3±54.<br>37  | 160±<br>38.74         | 135±<br>26            | 161.3<br>9±38.<br>71  | 150.9<br>9±41.<br>36  |
| 37 | ILC1<br>313       | G3<br>7 | 195.0<br>7±20<br>0.54 | 66.61<br>±12.6<br>7  | 168.8<br>±109.<br>81  | 183.2<br>3±11<br>3.94 | 367.6<br>6±21<br>0.86 | 291.8<br>3±28<br>7.74 | 309.1<br>6±28<br>2.68 | 177.8<br>3±11<br>6.29 | 371.6<br>6±22<br>4.6  | 299.8<br>3±29<br>6.01 | 256.2<br>9±32<br>3.09 | 67.74<br>±14.9<br>2   |
| 38 | ILC1<br>84        | G3<br>8 | 241.8<br>9±30.<br>54  | 50.69<br>±12.3<br>8  | 115.0<br>4±99.<br>89  | 53.2±<br>14.57        | 108.3<br>3±89.<br>85  | 94.83<br>±100.<br>86  | 102.1<br>6±96         | 45.16<br>±18.7<br>9   | 113.3<br>3±10<br>5.3  | 103.8<br>3±11<br>2.73 | 165.9<br>7±11<br>1.32 | 104.7<br>8±10<br>5.53 |
| 39 | ILC1<br>932       | G3<br>9 | 64.25<br>±30.8<br>3   | 39.04<br>±12.9<br>7  | 113.3<br>3±12<br>8.24 | 154.6<br>2±11<br>6.64 | 157±<br>112.8<br>5    | 76.66<br>±83.8<br>5   | 104.6<br>6±13<br>2.19 | 148.6<br>6±11<br>9.8  | 160.6<br>6±10<br>0.75 | 84.33<br>±74.6<br>4   | 42.93<br>±14.0<br>9   | 35.99<br>±8.43        |
| 40 | ILC2<br>39        | G4<br>0 | 172.9<br>8±52.<br>49  | 32.25<br>±9.84       | 110.5<br>3±12<br>9.37 | 28.9±<br>12.44        | 227.6<br>6±34<br>7.77 | 219±<br>355.0<br>7    | 225.6<br>6±34<br>9.47 | 19.66<br>±13.3<br>1   | 223.6<br>6±34<br>7.77 | 219±<br>351.6<br>4    | 285.1<br>3±30<br>9.04 | 88.18<br>±105.<br>17  |
| 41 | ILC8<br>666       | G4<br>1 | 211.9<br>2±61.<br>47  | 171.0<br>8±53.<br>94 | 278.1<br>7±39.<br>93  | 293.6<br>5±44.<br>79  | 257.3<br>3±10<br>7.68 | 187.6<br>6±11<br>3.35 | 186.3<br>3±11<br>1.06 | 218.6<br>6±10<br>1.47 | 234.3<br>3±77.<br>59  | 169.6<br>6±55.<br>77  | 186.6<br>3±83.<br>94  | 209.5<br>1±81.<br>97  |
| 42 | JG14              | G4<br>2 | 411.6<br>6±28.<br>36  | 363±<br>18.73        | 330±<br>126.2<br>9    | 248.6<br>6±12<br>1.7  | 235.1<br>6±98.<br>36  | 284.8<br>3±97.<br>98  | 350.1<br>6±17.<br>06  | 351.3<br>3±17         | 358.8<br>3±8.2<br>5   | 351.5<br>±5.26        | 376.1<br>6±43.<br>47  | 385.3<br>3±40.<br>01  |
